# Supplementary material for: Spherical Aberration-Corrected Metalens for Polarization Multiplexed Imaging
Source: MDPI journal article supplement (doi:10.3390/nano11112774), 2021-10-20
Supplement: s1 [file s1]

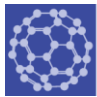

# Spherical Aberration-Corrected Metalens for Polarization Multiplexed Imaging

Shaodong Zhou <sup>1</sup>, Kelei Xi <sup>1</sup>, Songlin Zhuang <sup>1</sup> and Qingqing Cheng <sup>1,2,\*</sup>

<sup>1</sup> Shanghai Key Laboratory of Modern Optical System, School of Optical-Electrical and Computer Engineering, University of Shanghai for Science and Technology, Shanghai 200093, China; ShaodongZ@outlook.com (S.Z.); 202310308@st.usst.edu.cn (K.X.); slzhuangx@aliyun.com (S.Z.)

<sup>2</sup> State Key Laboratory of Terahertz and Millimeter Waves, City University of Hong Kong, Hong Kong, China

\* Correspondence: qqcheng@usst.edu.cn

## Supplementary Materials for “the derivation of Equation (5)”

The generalized Snell’s law of refraction:  $\frac{d\phi(\rho)}{d\rho} = \frac{2\pi}{\lambda} (\sin\theta_t - \sin\theta_i)$  show in Equation (1). The phase delay  $\phi(\rho)$  between rays respectively at position  $\rho$  and at the center in the radial dimension is:  $\phi(\rho) = \varphi(\rho) - \varphi(0) = \frac{2\pi}{\lambda} \left( -\sqrt{s^2 + \rho^2} - \sqrt{s'^2 + \rho^2} + s + s' \right)$ , as shown in Equation (4). By substituting  $s'$  into the upper equation and use the Gaussian imaging formation ( $\frac{sf}{s-f} = s'$ ), the detailed specifications show as:

$$\phi(\rho) = \frac{2\pi}{\lambda} \left( -\sqrt{s^2 + \rho^2} - \sqrt{\left(\frac{sf}{s-f}\right)^2 + \rho^2} + s + \frac{sf}{s-f} \right) = \frac{2\pi}{\lambda} \left( -\sqrt{s^2 + \rho^2} - \sqrt{\left(\frac{sf}{s-f}\right)^2 + \rho^2} + \frac{s(s-f) + sf}{s-f} \right).$$

Deduction steps are given:

$$\Rightarrow \frac{2\pi s}{\lambda(f-s)} \left( \frac{(s-f)\sqrt{s^2 + \rho^2}}{s} + \frac{s-f}{s} \sqrt{\left(\frac{sf}{s-f}\right)^2 + \rho^2} - s \right) = \frac{2\pi s}{\lambda(f-s)} \left( \frac{(s-f)\sqrt{s^2 + \rho^2}}{s} + \sqrt{\left(\frac{s-f}{s}\right)^2 \left[ \left(\frac{sf}{s-f}\right)^2 + \rho^2 \right]} - s \right).$$

$$\text{A clear simplified form is: } \phi(\rho) = \frac{2\pi s}{\lambda(f-s)} \left( \frac{(s-f)\sqrt{s^2 + \rho^2}}{s} + \sqrt{f^2 + \frac{(s-f)^2}{s^2} \rho^2} - s \right).$$

We rewrite the expression in the second sqrt of the above formula to include only the numerator and denominator, as shown  $\phi(\rho) = \frac{2\pi s}{\lambda(f-s)} \left( \frac{(s-f)\sqrt{s^2 + \rho^2}}{s} + \sqrt{\frac{s^2 f^2 + s^2 \rho^2 - 2sf\rho^2 + f^2 \rho^2}{s^2}} - s \right)$ . To express the above formula more clearly, we extract the two parts of  $s^2 + \rho^2$  and  $s^2 + \rho^2$  from the second sqrt, as shown:  $\phi(\rho) = \frac{2\pi s}{\lambda(f-s)} \left( \frac{(s-f)\sqrt{s^2 + \rho^2}}{s} + \sqrt{\frac{s^2 f^2 + f^2 \rho^2}{s^2} + \frac{(s^2 \rho^2 + s^4) + (s^2 \rho^2 - s^4) + (2s^3 f - 2sf\rho^2) + (-2s^3 f - 2sf\rho^2)}{2s^2}} - s \right)$ . We next give the steps of the intermediate process from the above formula to Equation (5) in the main body.

$$\Rightarrow \frac{2\pi s}{\lambda(f-s)} \left( \frac{(s-f)\sqrt{s^2 + \rho^2}}{s} + \sqrt{\frac{(s^2 + \rho^2)(2f^2 + s^2 - 2sf)}{2s^2} + \frac{(s^2 - \rho^2)(2sf - s^2)}{2s^2}} - s \right)$$

$$\Rightarrow \frac{2\pi s}{\lambda(f-s)} \left( \frac{(s-f)\sqrt{s^2 + \rho^2}}{s} + \frac{1}{\sqrt{2}} \sqrt{\left[ 2f^2 + s^2 - 2sf + s(2f - s) \frac{s^2 - \rho^2}{s^2 + \rho^2} \rho^2 \right] \frac{s^2 + \rho^2}{s^2}} - s \right)$$

Finally, we intuitively derive the above formula to Equation (5).
